# Supplementary material
Source: Springer Nature journal article supplement (https://www.springermedizin.de/resource/supplementary/13054_2012_620_MOESM3_ESM.pdf/9708856)

CO<sub>VolumeView</sub> vs. CO<sub>PiCCO</sub>

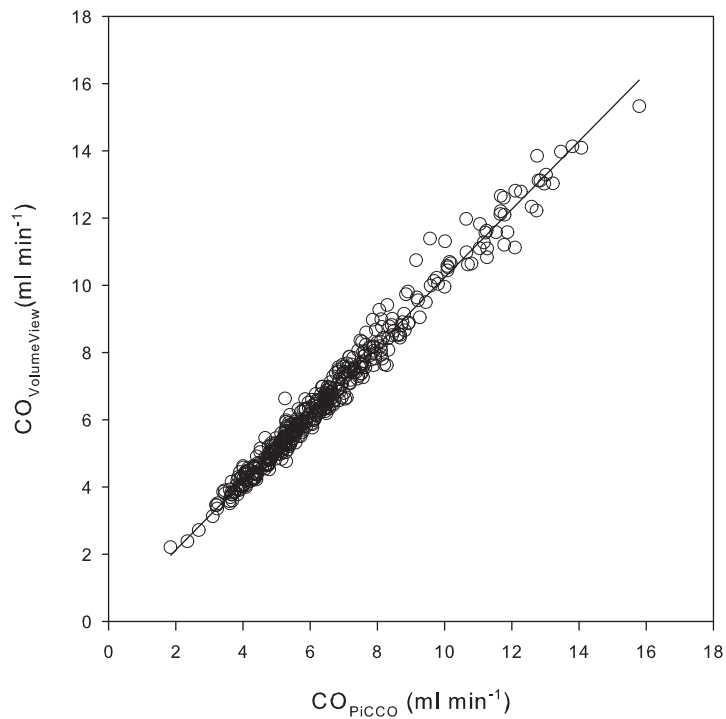

Bland Altman Plot CO

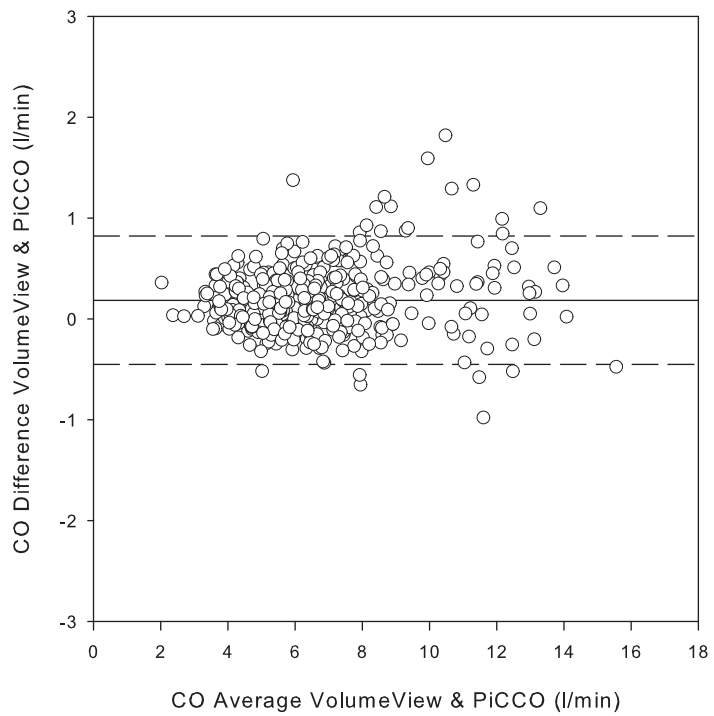

% Change CO (10% exclusion zone)

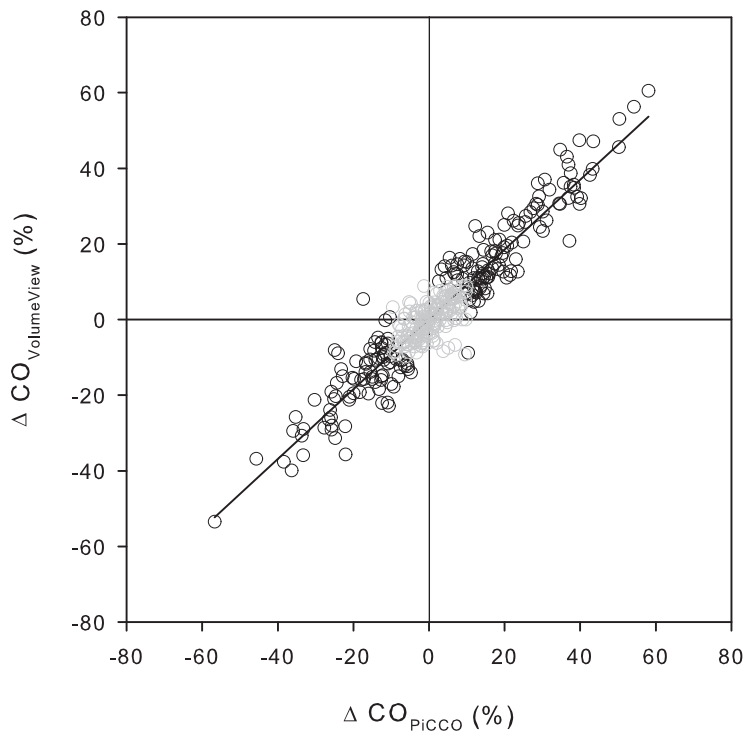

Polar Plot % Change CO

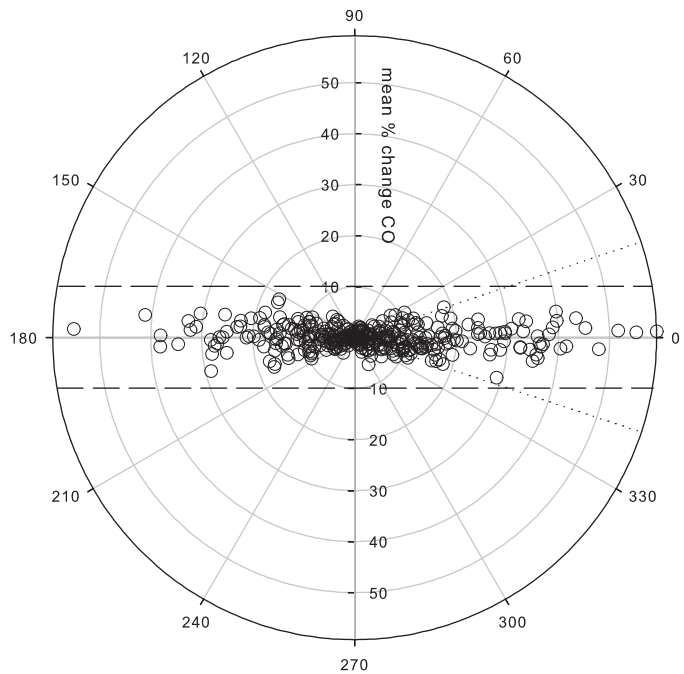

Supplement: MOESM3 [file 9708856]
